# Supplementary material for: Silica Nanoparticles-Induced Lysozyme Crystallization: Effects of Particle Sizes
Source: MDPI journal article supplement (doi:10.3390/cryst12111623), 2022-11-12
Supplement: s1 [file s1]

Article

# Silica Nanoparticles-Induced Lysozyme Crystallization: Effects of Particle Sizes

Yuxiao Zhang, Xuntao Jiang, Xia Wu, Xiaoqiang Wang, Fang Huang, Kefei Li, Gaoyang Zheng, Shengzhou Lu, Yanxu Ma, Yuyu Zhou and Xiaoxi Yu \*

State Key Laboratory of Heavy Oil Processing, College of Chemistry and Chemical Engineering, China University of Petroleum (East China), Qingdao 266580, China

\* Correspondence: yuxiaoxi@upc.edu.cn; Tel.: +86-17606393651

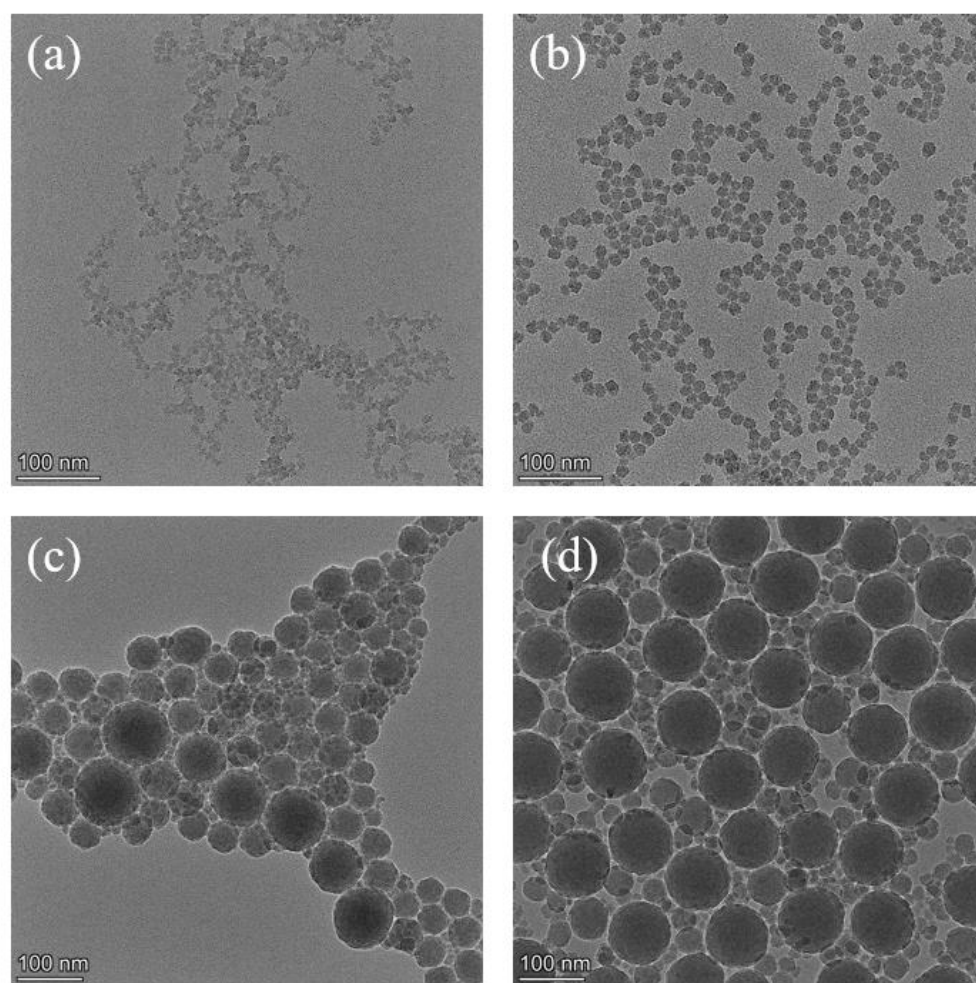

**Figure S1.** Transmission electron microscopy images of SNP with different particle sizes. (a): 5 nm SiO<sub>2</sub>, (b): 15 nm SiO<sub>2</sub>, (c): 50 nm SiO<sub>2</sub>, (d): 100 nm SiO<sub>2</sub>.

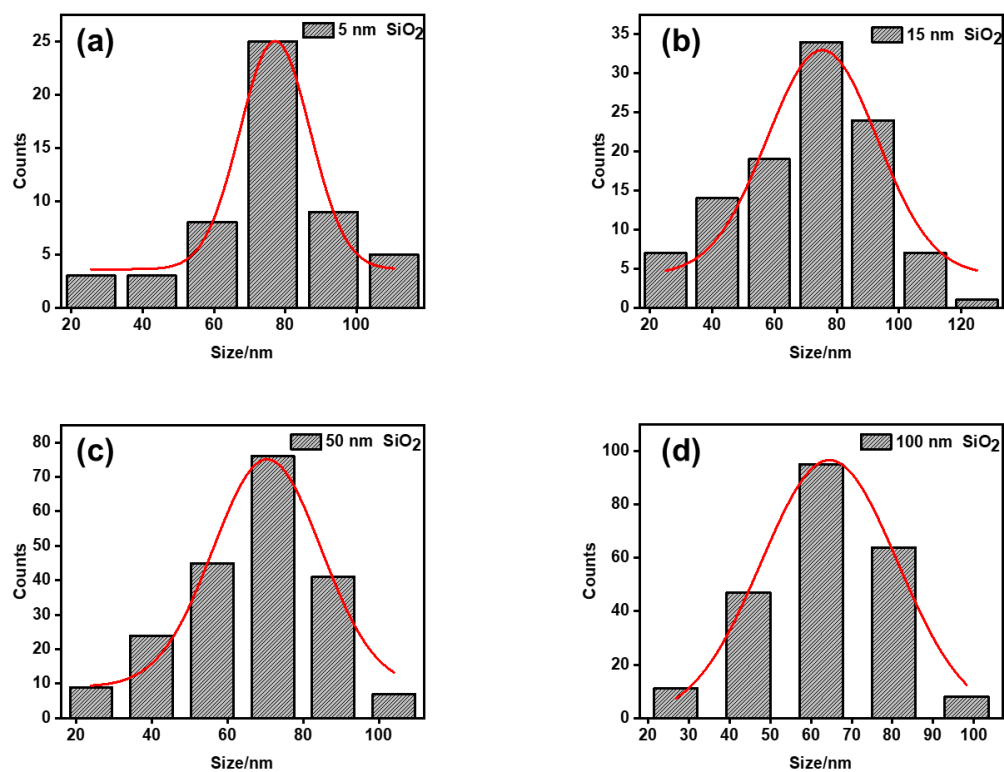

**Figure S2.** Crystal size distribution of 0.05 M, pH 4.5 sodium acetate buffer solution, 3 wt. % sodium chloride solution, 15 mg/mL lysozyme at 4 °C for 48 h. (a) 5 nm SiO<sub>2</sub>, (b) 15 nm SiO<sub>2</sub>, (c) 50 nm SiO<sub>2</sub>, (d) 100 nm SiO<sub>2</sub>.

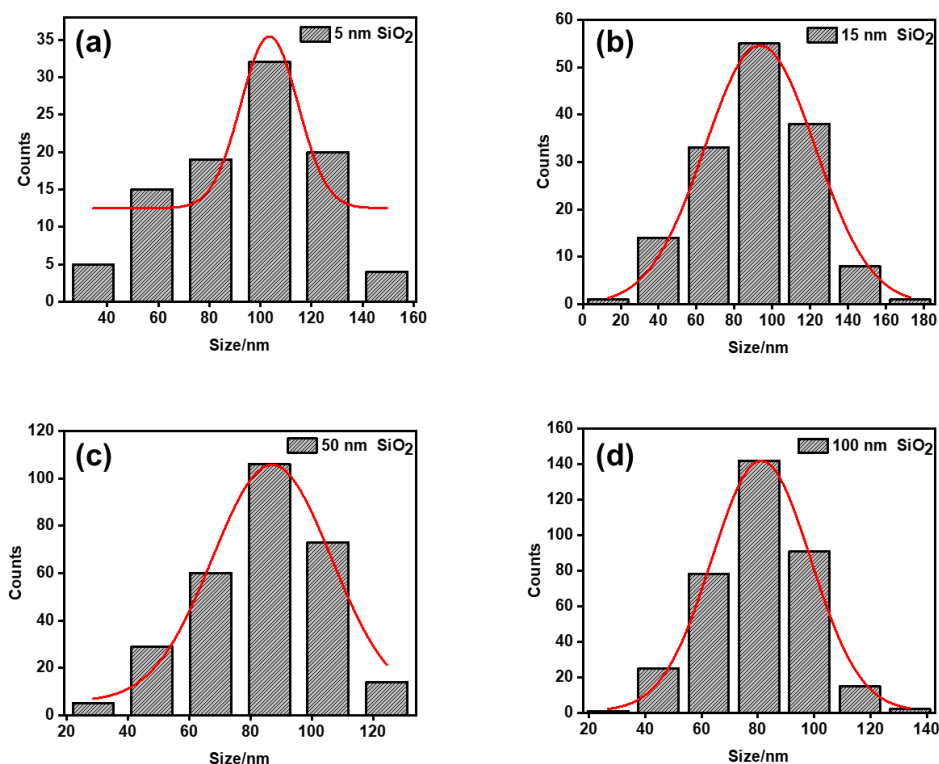

**Figure S3.** Crystal size distribution of 0.05 M, pH 4.5 sodium acetate buffer solution, 3 wt. % sodium chloride solution, 15 mg/mL lysozyme at 4 °C for 72 h. (a) 5 nm SiO<sub>2</sub>, (b) 15 nm SiO<sub>2</sub>, (c) 50 nm SiO<sub>2</sub>, (d) 100 nm SiO<sub>2</sub>.

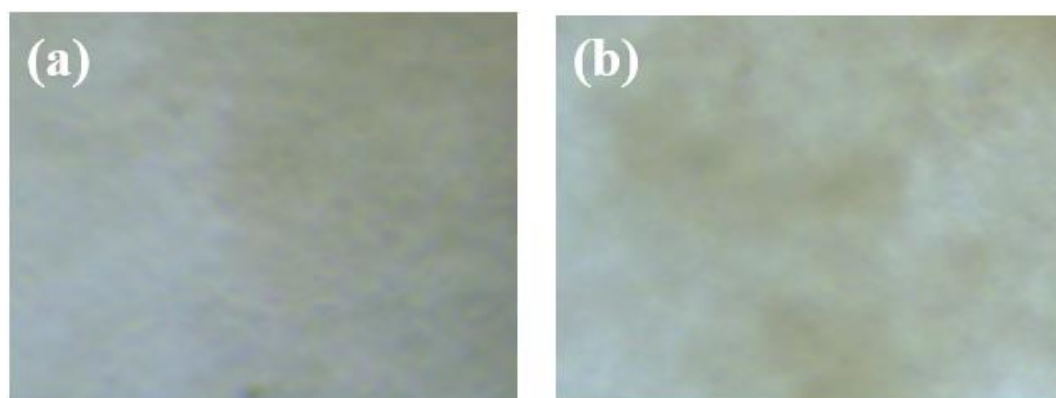

**Figure S4.** (a): Corresponding microscope image after mixing 1 mg/mL 50 nm SiO<sub>2</sub> and 20 mg/mL LSZ. (b): Corresponding microscope image after mixing 1 mg/mL 100 nm SiO<sub>2</sub> and 20 mg/mL LSZ.

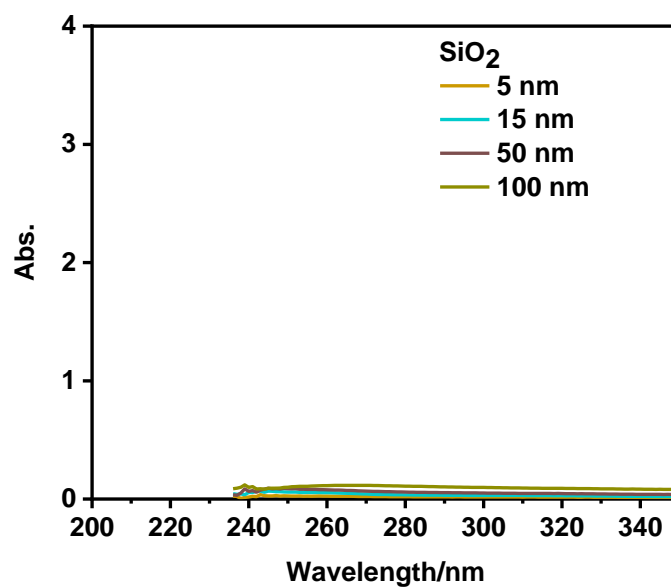

Figure S5. UV spectra of silica with different particle sizes.

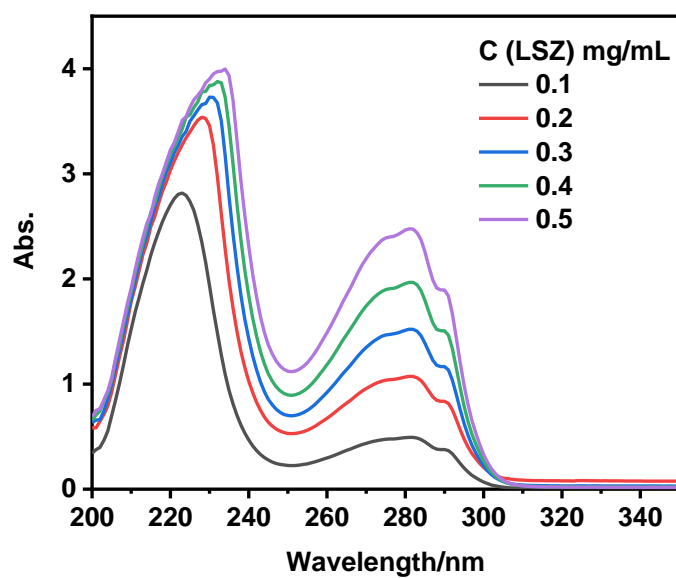

Figure S6. UV spectra of lysozyme at different concentrations.

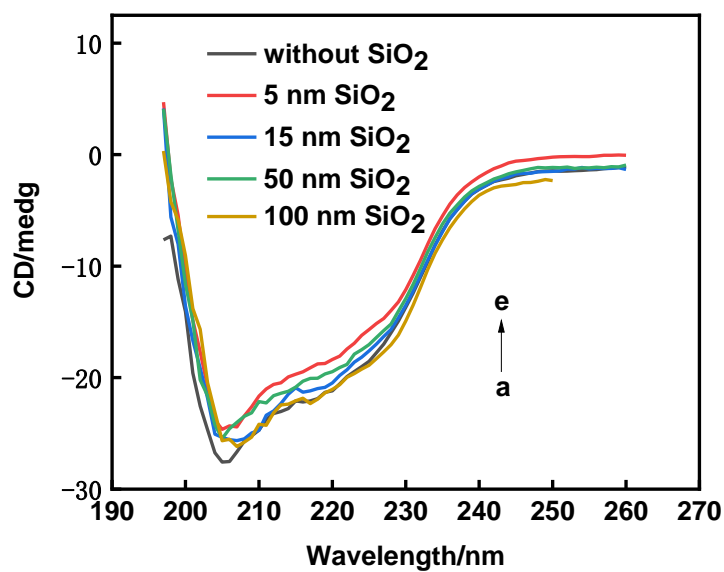

**Figure S7.** CD spectra of lysozyme in the presence and absence of SNP. From top to bottom: a, no SNP, b, 0.1 mg/mL 5 nm SiO<sub>2</sub>, c, 0.1 mg/mL 15 nm SiO<sub>2</sub>, d, 0.1 mg/mL 50 nm SiO<sub>2</sub>, e, 0.1 mg/mL 100 nm SiO<sub>2</sub>.
